# Supplementary material for: Protocadherin 15 suppresses oligodendrocyte progenitor cell proliferation and promotes motility through distinct signalling pathways
Source: PubMed Central journal article supplement (PMC9151716; doi:10.1038/s42003-022-03470-1), 2022-05-30
Supplement: 42003_2022_3470_MOESM1_ESM.pdf [file 42003_2022_3470_MOESM1_ESM.pdf]

Supplementary Data 1

Source data underlying graphs presented in main figures of Zhen et al.

Figure 2c

| Control shRNA | Pcdh15 shRNA |
|---------------|--------------|
| 100           | 3.611237     |
| 100           | 6.787354     |
| 100           | 0.698297     |
| 100           | 4.823397     |

Figure 2g

| control shRNA | Pcdh15 shRNA | No transfection |
|---------------|--------------|-----------------|
| 12.28739      | 7.522362     | 12.383          |
| 11.66062      | 7.463904     | 12.02018        |
| 10.76658      | 7.097379     | 10.53164        |

Figure 2l

| Control shRNA | Pcdh15 shRNA-A | Pcdh15 shRNA-B | Pcdh15 shRNA-C |
|---------------|----------------|----------------|----------------|
| 14.29326      | 10.61481       | 10.04163       | 11.5713        |
| 14.84547      | 9.238454       | 10.27592       | 10.46345       |
| 14.54202      | 9.44653        | 10.22494       | 9.306022       |

Figure 3g

| Control-shRNA | Pcdh15-shRNA |
|---------------|--------------|
| 10.3515       | 22.6831      |
| 11.1305       | 22.9133      |
| 9.0827        | 12.9862      |

Figure 3h

| Control shRNA | pcdh15 shRNA-A | pcdh15 shRNA-B | pcdh15 shRNA-C |
|---------------|----------------|----------------|----------------|
| 28.4295       | 46.86005       | 46.5593        | 46.5093        |
| 16.3274       | 34.29          | 35.2913        | 34.1455        |
| 26.5363       | 42.5659        | 40.8625        | 47.5235        |

Figure 3q

|                | control-shRNA | control-shRNA | control-shRNA | pcdh15-shRNA | pcdh15-shRNA | pcdh15-shRNA |
|----------------|---------------|---------------|---------------|--------------|--------------|--------------|
| cell in single | 87.63152      | 91.44444      | 88.60778      | 81.8444      | 80.2758      | 82.86748     |
| cell in pairs  | 10.5503       | 8.555556      | 10.11728      | 16.3699      | 19.7242      | 15.91234     |
| cell in        | 1.818182      | 0             | 1.274945      | 1.78571      | 0            | 1.46969      |
| cell in fours  | 0             | 0             | 0             | 0            | 0            | 0.126667     |

Figure 3r

| control-shRNA | Pcdh15-shRNA |
|---------------|--------------|
| 59.24787      | 36.83169     |
| 46.93185      | 32.64447     |
| 57.21912      | 38.94054     |

Figure 4b

| control-shRNA | pcdh15 shRNA |
|---------------|--------------|
|---------------|--------------|

|          |          |
|----------|----------|
| 1.09187  | 0.889082 |
| 0.645817 | 0.366404 |
| 1.341283 | 0.55349  |

Figure 4c

|               |              |
|---------------|--------------|
| control shRNA | pcdh15 shRNA |
| 0.771146      | 0.856694     |
| 0.67369       | 0.763281     |
| 0.540401      | 0.544781     |

Figure 4e

| p-ERK1/ERK1   |              | p-ERK2/ERK2   |              |
|---------------|--------------|---------------|--------------|
| control-shRNA | pcdh15-shRNA | control-shRNA | pcdh15-shRNA |
| 0.398606      | 0.826693     | 1.138381      | 1.504537     |
| 0.305064      | 0.747518     | 1.340477      | 1.943964     |
| 0.314589      | 0.610468     | 1.246828      | 1.563034     |

Figure 4g

| p-ERK1/ERK1   |              |                      |                     | p-ERK2/ERK2   |              |                      |                     |
|---------------|--------------|----------------------|---------------------|---------------|--------------|----------------------|---------------------|
| Control-shRNA | PCDH15-shRNA | Control-shRNA+U01 26 | PCDH15-shRNA+U01 26 | Control-shRNA | PCDH15-shRNA | Control-shRNA+U01 26 | PCDH15-shRNA+U01 26 |
| 100           | 199.1318     | 27.326               | 33.5428             | 100           | 113.898      | 14.6426              | 17.4034             |
| 100           | 139.4453     | 21.4031              | 34.5838             | 100           | 136.273      | 19.7364              | 26.837              |
| 100           | 151.1525     | 41.7225              | 26.2476             | 100           | 123.351      | 50.3355              | 32.4373             |

Figure 4l

| Control-shRNA | PCDH15-shRNA | Control-shRNA+U01 26 | PCDH15-shRNA+U01 26 |
|---------------|--------------|----------------------|---------------------|
| 16.931        | 25.139       | 4.05                 | 6.3579              |
| 17.72512      | 28.7604      | 5.895                | 7.4252              |
| 17.5068       | 37.8791      | 8.5                  | 10.87               |

Figure 5b

|               |              |
|---------------|--------------|
| Control-shRNA | PCDH15-shRNA |
| 1.873         | 18.38        |
| 4             | 56.6         |
| 4.974         | 41.65        |

Figure 5d

|               |              |
|---------------|--------------|
| Control-shRNA | PCDH15-shRNA |
| 8.761         | 47.49        |
| 9.749         | 74.79        |
| 9.103         | 80.92        |

Figure 5l

|               |              |
|---------------|--------------|
| control-shRNA | Pcdh15-shRNA |
| 5.08          | 2.97561      |
| 5.647059      | 3.09375      |
| 5.047619      | 3.125        |

Figure 5h

| control-shRNA | pcdh15-shRNA |
|---------------|--------------|
| 1.545         | 0.905536     |
| 1.063         | 0.5588       |
| 1.069         | 0.52         |

Figure 5j

| Control-shRNA | PCDH15-shRNA |
|---------------|--------------|
| 0.729404      | 0.521671     |
| 0.615759      | 0.244931     |
| 0.696832      | 0.328145     |
| 0.839343      | 0.198792     |
| 0.394916      | 0.273334     |
| 0.418429      | 0.251302     |
| 0.575311      | 0.327045     |
| 0.46474       | 0.311375     |
| 0.691089      | 0.323119     |
| 0.533602      | 0.267841     |
| 0.511624      | 0.427618     |
| 0.384027      | 0.221029     |
| 0.910134      | 0.699511     |
| 0.548212      | 0.245337     |
| 0.594506      | 0.227001     |
| 0.490641      | 0.421604     |
| 0.429384      | 0.414105     |
| 0.333408      | 0.319863     |
| 0.429251      | 0.284084     |
| 0.40295       | 0.2331       |
| 0.282465      | 0.183919     |
| 0.40295       | 0.369606     |
| 0.445132      | 0.403833     |
| 0.558018      | 0.56803      |
| 0.493827      | 0.403833     |
| 0.697125      | 0.230524     |
| 0.516094      | 0.434959     |
| 0.710979      | 0.233674     |
| 0.630021      | 0.449943     |
| 0.521941      | 0.400747     |
| 0.728526      | 0.393749     |
| 0.362869      | 0.344492     |
| 0.33306       | 0.294658     |
| 0.475645      | 0.211936     |
| 0.619217      | 0.243251     |
| 0.471249      | 0.376114     |
| 0.384068      | 0.280528     |
| 0.630961      | 0.300622     |
| 0.227894      | 0.288544     |
| 0.434153      | 0.27862      |

|          |          |
|----------|----------|
| 0.611506 | 0.391122 |
| 0.465037 | 0.388096 |
| 0.469926 | 0.225201 |
| 0.293808 | 0.391122 |
| 0.57317  | 0.388096 |
| 0.604427 | 0.225201 |
| 0.423068 | 0.233533 |
| 0.429702 | 0.524742 |
| 0.601278 | 0.297774 |
| 0.564056 | 0.391483 |
| 0.47506  | 0.299881 |
| 0.470543 | 0.198792 |

Figure 5k

| Control-shRNA | PCDH15-shRNA |
|---------------|--------------|
| 43.0348       | 30.7786      |
| 36.3298       | 14.4509      |
| 41.1131       | 19.3605      |
| 49.5212       | 11.7287      |
| 23.3          | 16.1267      |
| 24.6873       | 14.8268      |
| 33.9434       | 19.2957      |
| 27.4197       | 18.3712      |
| 40.7742       | 19.0641      |
| 31.4825       | 15.8026      |
| 30.1858       | 25.2295      |
| 22.6576       | 13.0407      |
| 53.6979       | 41.2711      |
| 32.3445       | 14.4749      |
| 35.0758       | 13.3931      |
| 28.9478       | 24.8746      |
| 25.3337       | 24.4322      |
| 19.6711       | 18.8719      |
| 25.3258       | 16.7609      |
| 23.774        | 13.7529      |
| 16.6654       | 10.8512      |
| 23.774        | 21.8067      |
| 26.2628       | 23.8261      |
| 32.923        | 33.5138      |
| 29.1358       | 23.8261      |
| 41.1303       | 13.6009      |
| 30.4495       | 25.6626      |
| 41.9478       | 13.7868      |
| 37.1712       | 26.5466      |
| 30.7945       | 23.6441      |
| 42.983        | 23.2312      |
| 21.4093       | 20.325       |
| 19.6505       | 17.3848      |
| 28.063        | 12.5042      |
| 36.5338       | 14.3518      |

|         |         |
|---------|---------|
| 27.8037 | 22.1907 |
| 22.66   | 16.5512 |
| 37.2267 | 17.7367 |
| 13.4458 | 17.0241 |
| 25.615  | 16.4386 |
| 36.0789 | 23.0762 |
| 27.4372 | 22.8977 |
| 27.7256 | 13.2869 |
| 17.3347 | 23.0762 |
| 33.817  | 22.8977 |
| 35.6612 | 13.2869 |
| 24.961  | 13.7784 |
| 25.3524 | 30.9598 |
| 35.4754 | 17.5686 |
| 33.2793 | 23.0975 |
| 28.0286 | 17.693  |
| 27.7621 | 11.7287 |

Figure 5I

| Control-shRNA | PCDH15-shRNA |
|---------------|--------------|
| 12.0326       | 11.9331      |
| 15.8704       | 4.32618      |
| 10.0038       | 5.22971      |
| 14.8591       | 10.551       |
| 2.68729       | 6.67173      |
| 7.60079       | 4.32822      |
| 9.15314       | 7.97266      |
| 11.7053       | 1.22507      |
| 13.4233       | 7.07753      |
| 9.69279       | 1.13531      |
| 8.42596       | 10.1632      |
| 10.9614       | 4.87862      |
| 6.59721       | 2.16309      |
| 1.87917       | 7.10368      |
| 9.57088       | 2.13019      |
| 10.9227       | 7.04252      |
| 17.3603       | 9.57181      |
| 3.21388       | 2.22744      |
| 4.22292       | 2.49655      |
| 16.087        | 7.87125      |
| 4.58187       | 8.45106      |
| 16.087        | 11.2852      |
| 6.26783       | 3.72295      |
| 3.80504       | 6.02656      |
| 2.71018       | 3.72295      |
| 17.2357       | 7.93047      |
| 2.92331       | 6.33508      |
| 9.18395       | 1.73251      |
| 4.79282       | 13.0146      |
| 7.27437       | 15.8431      |

|         |         |
|---------|---------|
| 17.5404 | 4.05658 |
| 7.86789 | 9.09023 |
| 9.098   | 7.15568 |
| 17.6922 | 2.61063 |
| 6.68759 | 8.79807 |
| 12.0179 | 9.07079 |
| 14.0938 | 7.74803 |
| 6.51507 | 3.76304 |
| 6.63458 | 7.85778 |
| 11.616  | 5.89773 |
| 12.0502 | 7.79914 |
| 8.32158 | 8.37235 |
| 10.8383 | 6.85963 |
| 9.06787 | 7.79914 |
| 11.2696 | 8.37235 |
| 16.8461 | 6.85963 |
| 10.1727 | 9.02982 |
| 8.8111  | 10.8155 |
| 14.7309 | 6.29594 |
| 8.21803 | 11.942  |
| 18.3222 | 6.65981 |
| 9.83654 | 10.551  |

Figure 6b

| Control-shRNA | PCDH15-shRNA | Control-shRNA+U0126 | PCDH15-shRNA+U0126 |
|---------------|--------------|---------------------|--------------------|
| 5.705714      | 22.86        | 5.174038            | 24.16806           |
| 8.722685      | 29.85333     | 9.450792            | 26.9963            |
| 3.873497      | 17.85        | 4.046912            | 19.58333           |

Figure 6c

| Control-shRNA | PCDH15-shRNA | Control-shRNA+U0126 | PCDH15-shRNA+U0126 |
|---------------|--------------|---------------------|--------------------|
| 9.290361      | 47.84        | 11.69593            | 42.66667           |
| 7.913836      | 44.19133     | 10.60482            | 31.30667           |
| 10.35765      | 28.35556     | 9.992691            | 28.10767           |

Figure 6e

| Control-shRNA | Pcdh15-shRNA | Contol-shRNA+U0126 | Pcdh15-shRNA+U0126 |
|---------------|--------------|--------------------|--------------------|
| 4.823529      | 2.962963     | 4.636364           | 2.857143           |
| 4.642857      | 2.733333     | 4.714286           | 3.029412           |
| 5             | 3.352941     | 4.809524           | 3.179487           |

Figure 6f

| Control-shRNA | PCDH15-shRNA | Control-shRNA+U0126 | pcdh15-shRNA+U0126 |
|---------------|--------------|---------------------|--------------------|
| 1.9466666     | 0.911        | 2.041667            | 0.99               |
| 1.97925       | 0.96666      | 2.041667            | 1.076388           |
| 2.033333      | 0.776667     | 2                   | 0.722222           |

Figure 7b

| Control-shRNA | PCDH15-shRNA |
|---------------|--------------|
| 100           | 132.8143     |
| 100           | 120.0394     |
| 100           | 137.8859     |

Figure 7c

| Control-shRNA | Pcdh15-shRNA |
|---------------|--------------|
| 0.38          | 0.355        |
| 0.366364      | 0.431818     |
| 0.374783      | 0.35381      |

Figure 7e

| control-shRNA | pcdh15-shRNA |
|---------------|--------------|
| 1.365062      | 1.324165     |
| 1.209761      | 1.69704      |
| 1.27969       | 1.931176     |

Figure 7f

| control-shRNA | pcdh15-shRNA |
|---------------|--------------|
| 0.540122      | 0.643673     |
| 0.610642      | 0.714134     |
| 0.657479      | 0.641702     |

Figure 7i

| Control-shRNA | Pcdh15-shRNA |
|---------------|--------------|
| 0.836139      | 1.056569     |
| 0.628896      | 0.978384     |
| 0.472723      | 0.920638     |

Figure 7j

| Control-shRNA | Pcdh15-shRNA |
|---------------|--------------|
| 0.202631      | 0.380655     |
| 0.235737      | 0.411465     |
| 0.289141      | 0.410022     |

Figure 7k

| Control-shRNA | Pcdh15-shRNA |
|---------------|--------------|
| 0.840919      | 1.135117     |
| 0.858036      | 1.155147     |
| 0.890574      | 1.115998     |

Figure 7l

| Control-shRNA | Pcdh15-shRNA |
|---------------|--------------|
| 0.668851      | 0.832201     |
| 0.651889      | 0.740218     |
| 0.536267      | 0.782073     |

Figure 7m

| Control-shRNA | Pcdh15-shRNA |
|---------------|--------------|
| 0.458196      | 0.867206     |
| 0.708471      | 0.960744     |
| 0.567472      | 0.862117     |

Figure 9n

| control-shRNA |          |          | pcdh15-shRNA |         |         |
|---------------|----------|----------|--------------|---------|---------|
| DMSO          | CK666    | ML141    | DMSO         | CK666   | ML141   |
| 26.57596      | 20.96576 | 20.11114 | 36.12855     | 19.9112 | 19.548  |
| 25.90653      | 21.17888 | 22.12941 | 32.22067     | 20.8177 | 18.1251 |
| 26.64439      | 18.69732 | 18.55645 | 31.14857     | 18.6707 | 18.8994 |

Figure 9p

| control-shRNA | Pcdh15-shRNA | Contol-shRNA+ML1<br>41 | Pcdh15-shRNA+ML1<br>41 |
|---------------|--------------|------------------------|------------------------|
| 10.10686      | 29.91621     | 3.812338               | 7.737764               |
| 16.58435      | 34.03174     | 6.708333               | 7.988872               |
| 11.94896      | 30.65875     | 7.754167               | 8.571429               |

Figure 9q

| control-shRNA | Pcdh15-shRNA | Contol-shRNA+ML1<br>41 | Pcdh15-shRNA+ML1<br>41 |
|---------------|--------------|------------------------|------------------------|
| 16.94472      | 37.91539     | 7.382759               | 10.51533               |
| 14.92353      | 32.50688     | 8.451241               | 12.09779               |
| 17.452        | 44.95052     | 7.65055                | 13.53304               |

Figure 10b

| Control-shRNA | Pcdh15-shRNA | Contol-shRNA+ML1<br>41 | Pcdh15-shRNA+ML1<br>41 |
|---------------|--------------|------------------------|------------------------|
| 5.128205      | 3.135135     | 2.88                   | 2.666667               |
| 4.608696      | 2.976744     | 2.952381               | 2.946429               |
| 4.896552      | 2.941176     | 3                      | 2.909091               |

Figure 10c

| control-shRNA | Pcdh15-shRNA | Contol-shRNA+ML1<br>41 | Pcdh15-shRNA+ML1<br>41 |
|---------------|--------------|------------------------|------------------------|
| 2.975         | 1.813888     | 2.06714                | 2.1                    |
| 2.85          | 1.616662     | 1.805556               | 1.805556               |
| 2.725         | 1.5          | 1.68333                | 2                      |
