# Supplementary material for: Protocadherin 15 suppresses oligodendrocyte progenitor cell proliferation and promotes motility through distinct signalling pathways
Source: PubMed Central journal article supplement (PMC9151716; doi:10.1038/s42003-022-03470-1), 2022-05-30
Supplement: 42003_2022_3470_MOESM4_ESM.pdf [file 42003_2022_3470_MOESM4_ESM.pdf]

## Description of Additional Supplementary Files

**File name:** Supplementary Data 1

**Description:** Underlying source data for all graphs and charts.
